# Supplementary material
Source: PubMed Central journal article supplement (PMC4351820)

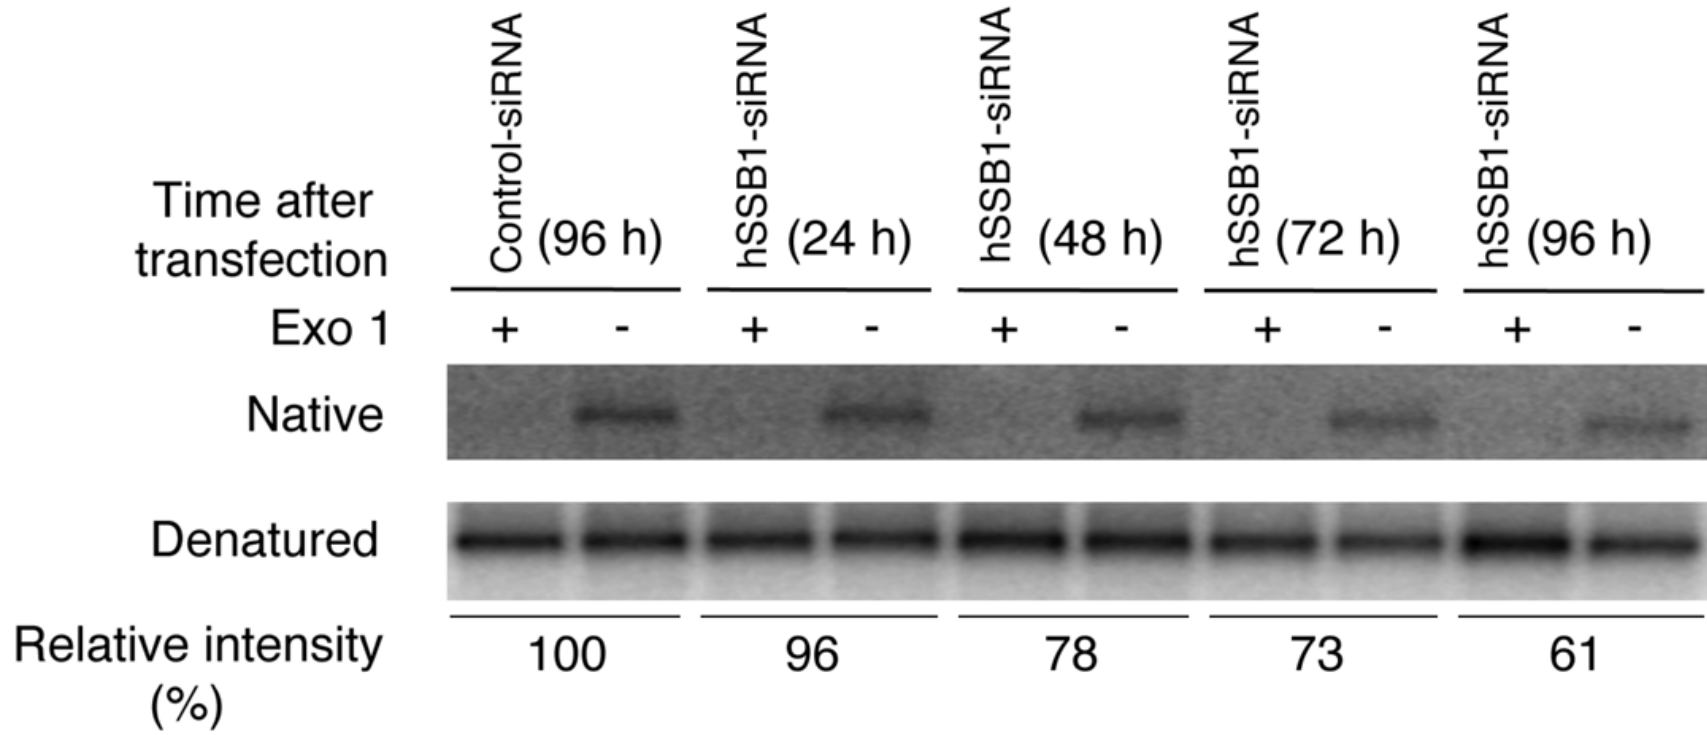

**Supplementary Fig. 1**

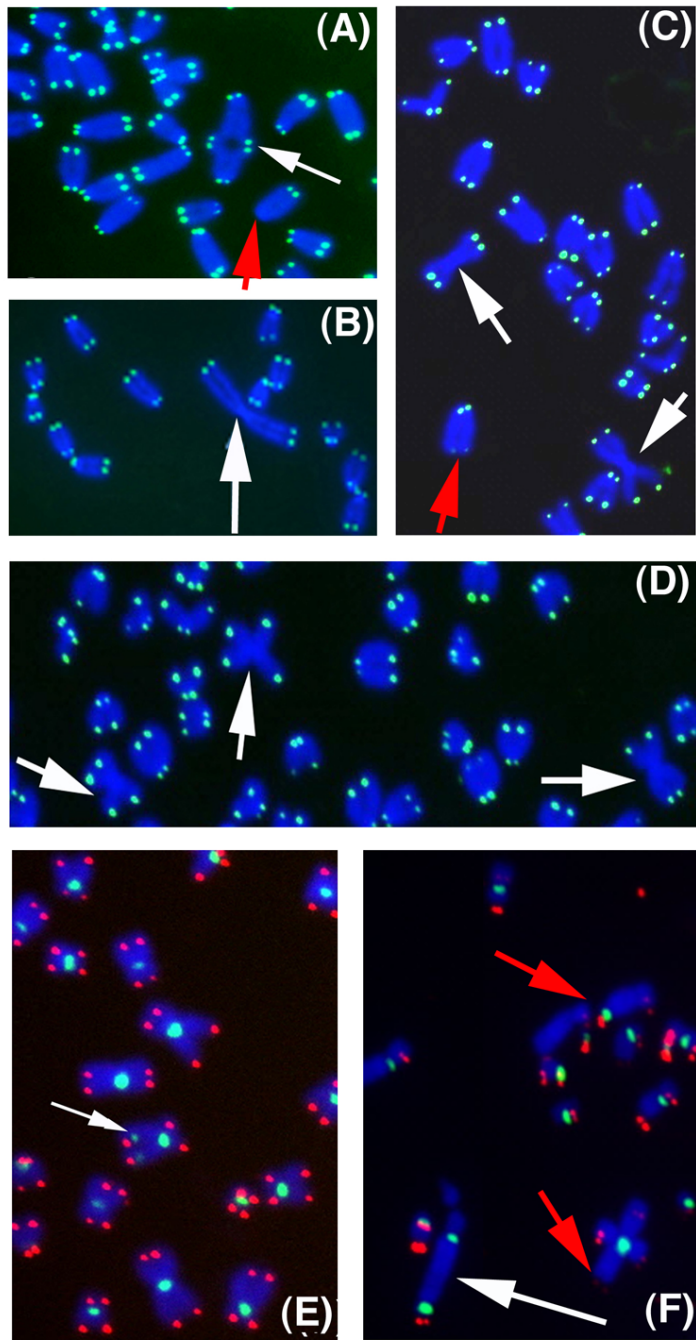

Supplementary Fig. 2

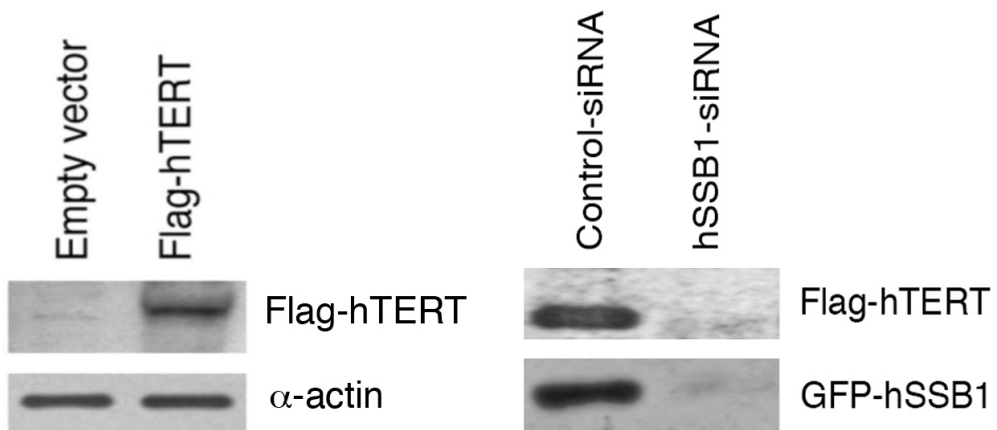

(A)

(B)

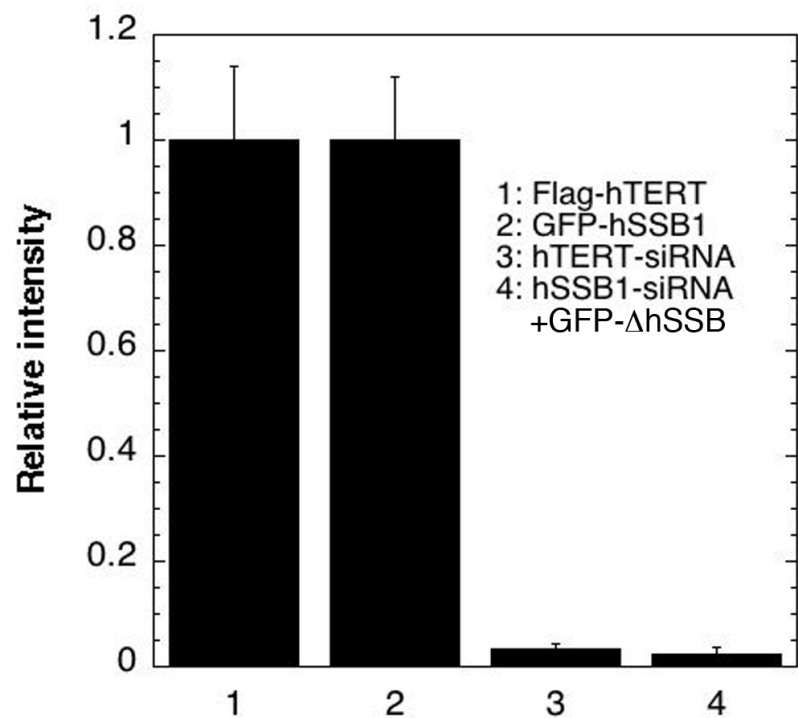

(D)

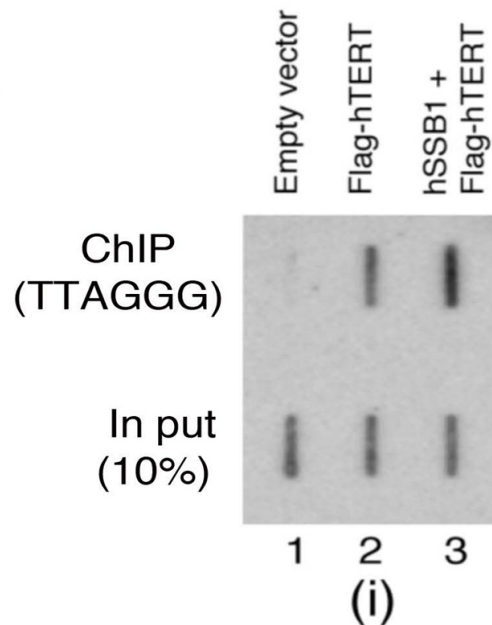

(C)

(ii)

Supplementary Fig. 3

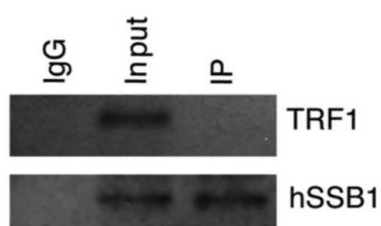

(A)

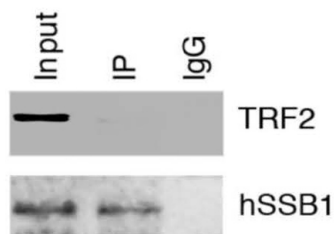

(B)

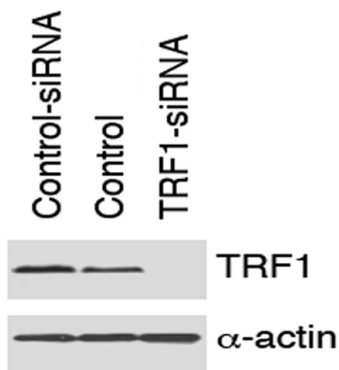

(C)

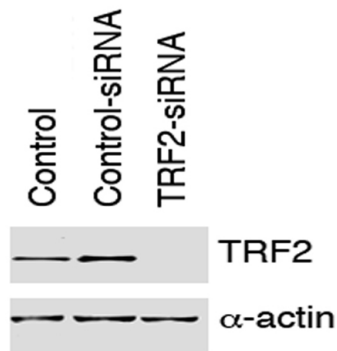

(D)

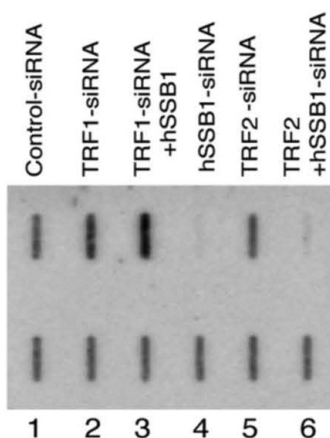

(i)

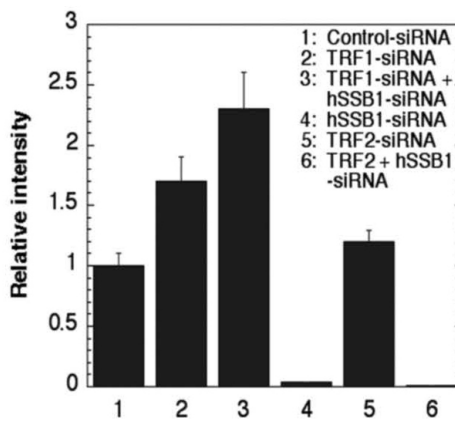

(E)

(ii)

**Supplementary Fig. 4**

Supplement: NIHMS655870-supplement-2.pdf [file NIHMS655870-supplement-2.pdf]
